# Supplementary material
Source: PubMed Central journal article supplement (PMC3790302)

**Suppl. Figure 1.** Introductory information sent to the 2012 ABRF gPRG study participating laboratories.

## 2012 Comparative Glycopeptide Mapping Study

### Invitation

Laboratories engaged in mass spectrometry-based proteomics, glycoproteomics, or glycomics are invited to participate in a glycoprotein analysis study in 2012. This study was initiated by the Glycoprotein Research Group of the Association for Biomolecular Resource Facilities (ABRF). Those indicating interest will be sent two sources of prostate specific antigen (PSA) for comparative glycopeptide *N*-glycosylation analysis. Samples will be sent in early March, 2012. The deadline for submission of results will be July 31, 2012. The results will be communicated in a publication that will be written by the study organizers. All those submitting data for the study will be included as co-authors for this publication. The study results will be presented at the ABRF annual conference in 2013 and at other scientific meetings. To participate please email your interest to Joe Zaia ([jzaia@bu.edu](mailto:jzaia@bu.edu)) and include your shipping address.

### Study goals

The goal of this study is to determine the ability of the glycoproteomics community to compare *N*-glycosylation between two different sources of prostate specific antigen (PSA). The PSA sources have been selected by the study organizers and the differences in glycosylation are known.

#### Background

Accurate mapping of glycoprotein glycosylation is essential for basic glycosciences, biomarker discovery, and recombinant glycoprotein therapeutic characterization. For these purposes, it is necessary to identify and determine the abundances of glycopeptides derived from the target protein. This glycopeptide mapping insures that data are produced from the target proteins rather than from contaminants. *N*-Linked glycopeptides are present typically as a series of glycoforms, all containing the chitobiose core. Because proteolytic digestion often results in glycopeptides containing incomplete cleavage sites, the abundances of glycopeptide glycoforms must be reconstructed from those of several different ions. For these reasons, accurate glycopeptide mapping represents an analytical challenge.

### Study rationale

This is a glycopeptide mapping study. For the purpose of accurate determination of glycoprotein glycosylation, it is necessary to determine glycosylation on specific peptides. Most glycoprotein samples are not pure. Contamination with other proteins, even at a level of a few percent, may give rise to false positive identifications. Thus, for the purpose of identifying the peptide and glycan parts, it is important to determine the masses of intact glycopeptides. Investigators may also wish to analyze released glycans. The study will compare results obtained using glycopeptides with those from released glycans.

### Data reporting

Participants should report their results using an Excel template that will be provided by the organizing committee. To use this template, the data should be converted into glycan compositions (Hex, HexNAc, dHex, NeuAc, NeuGc, Sulfate, Phosphate) that modify the PSA *N*-glycosylation site.

### Study sponsors

PSA was donated generously by Lee Biosolutions. Support for the costs of the study was provided by the Association for Biomolecular Resource Facilities, Thermo-Fisher Scientific, and Bruker Daltonics, Inc.

We look forward to your participation. Sincerely,

Study organizers

|                 |                                                               |
|-----------------|---------------------------------------------------------------|
| Nancy Leymarie  | (Center for Biomedical Mass Spectrometry, Boston University)  |
| Joseph Zaia     | (Center for Biomedical Mass Spectrometry, Boston University)  |
| Ron Orlando     | (Complex Carbohydrate Research Center, University of Georgia) |
| Daniel Kolarich | (Max Plank Institute of Colloids and Interfaces)              |
| Karen Jonscher  | (University of Colora                                         |

# ABRF GlycoProtein Research Group (gPRG)

## Joseph Zaia

Boston University School of Medicine  
Professor of Biochemistry

## Nancy Leymarie

Boston University School of Medicine  
Senior Scientist: Glycomics

## Karen Joncher

University of Colorado Denver  
Proteomics Director Systems Biology Core Facility

## Daniel Kolarich

Max Planck Institute of Colloids and Interfaces, Berlin  
Group Leader: Glycoproteomics

## Ron Orlando

Complex Carbohydrate Research Center  
Professor of Biochemistry and Molecular Biology, and Chemistry



Current members  
of the ABRF gPRG



Founded in 2005  
By Ron Orlando

***Expansion of the group is needed!***

# ABRF GlycoProtein Research Group (gPRG)

- **Interest of the group**
  - site determination (N-, O- linked)
  - structure determination (complex, hybrid,...)
  - quantification (differential, % occupancy)
- **Explore methods and technology**
  - strategies available for characterization
- **Develop resources for education**
  - Workshops: ABRF, US-HUPO, HUPO
  - gPRG Study: ABRF 2010, 2011/2012

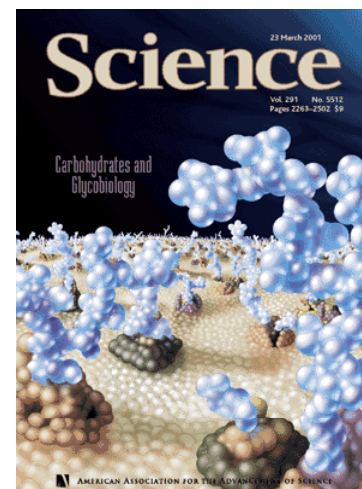

*Science, Carbohydrates and Glycobiology, 23 March 2001, Vol. 291 no. 5512.*

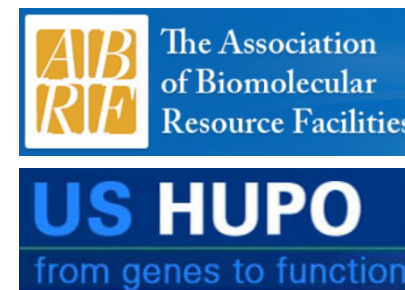

# 2012 gPRG study: Criteria for the Ideal Glycoprotein

- **Goal is to characterize glycosylation & target glycopeptides**
  - Map sites
  - Characterize glycosylation
  - Differential quantification
- **Suitable protein target**
  - Biological impact
  - Protein commercially available
  - Inexpensive
  - large amount
  - Mammalian/ human
  - Ideally one site of glycosylation

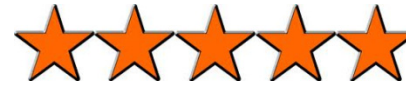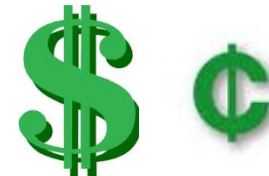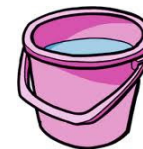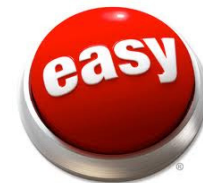

# 2012 gPRG study : Human Prostate Specific Antigen

## *Biological impact*

- **Known diagnostic marker for prostate cancer**
- **Statistics of prostate cancer**
  - One of the most common cancers
  - 240,000 new cases every year
  - 28,000 deaths per year
  - second leading cause of cancer death in American men
  - 1/6 men will have cancer in their life

# 2012 gPRG study : Human Prostate Specific Antigen

- **Mechanism**
  - PSA secreted as a proenzyme into the lumen of prostate gland
  - In disease (cancer, benign prostatic hyperplasia), the membrane can be disrupted
  - PSA will leak into the peripheral circulation
  - In blood PSA is free or complexes with a protease inhibitor as alpha-1-antichymotrypsin
- **Correlation between prostate cancer and [PSA]**
  - Healthy men, [PSA] < 4ng/ml, normal examination : 15% chance of prostate cancer
  - Grey zone : 2.5 to 10 ng/ml : 25% chance of prostate cancer
  - >10ng/ml : 67% chance of prostate cancer
  - **- PSA is not a perfect Biomarker**
- **Improvement of the specificity of prostate cancer detection**
  - Measurements of % complexed, % specific and % free (proPSA or cleaved PSA)
  - Measure glycosylation pattern : know to change in cancer tissue

▶ **Glycosylation pattern of PSA and Cancer ??**

# Human Prostate Specific Antigen & Glycosylation

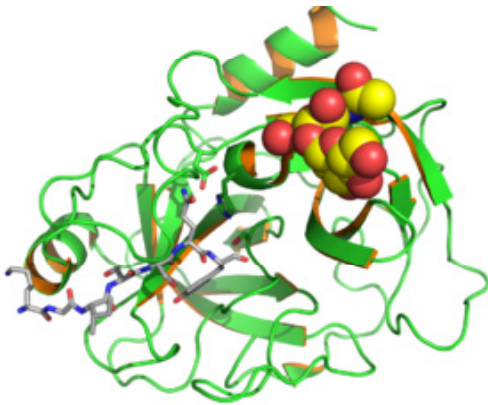

## PSA Characteristics

- Function : Hydrolyzes semenogelin-1 thus leading to the liquefaction of the seminal coagulum.
- $\approx$  30 kDa, 261 Aa
- 5 disulfide bonds reported
- 1 N-linked glycosylation site : aa 69

## Glycans from seminal fluid from healthy patient

- Sialylated complex biantennary, mostly core fucosylated
- Minor presence of GalNAc on the antennae, increases with the pI of PSA
- High Mannose and hybrid glycans reported

## Glycans from cancer patient vs healthy patients

- Glycans: **contradictory**, **purity of sample, cell lines vs patient cancer**
- Glycopeptides: PSA N-Glycans seminal plasma of healthy patient less sialylated than than PSA N-Glycan for cancer patient
- Linkage: 2-3 linked sialic acid could distinguish malignant from benign



# Study Rational

- **Goal is to characterize glycosylation & target glycopeptides**
  - Map sites
  - Characterize glycosylation
  - Differential quantification
- **Ideal scenario**
  - Obtain PSA from plasma draw
  - Compare glycosylation healthy controls vs. cancer
  - Identify the biomarker
- **In reality**
  - “Off the shelf” PSA
  - Purified from seminal fluid
  - Take part in the gPRG 2012 study!

# Initial Proteomics Analysis of PSA

## PSA\_high Isoform

|                                | Score | Mass   | Matches   | Sequences |
|--------------------------------|-------|--------|-----------|-----------|
| 1 <a href="#">KLK3 HUMAN</a>   | 1883  | 29293  | 230 (101) | 79 (48)   |
| 2 <a href="#">FINC HUMAN</a>   | 215   | 266034 | 17 (9)    | 17 (9)    |
| 3 <a href="#">TPIS HUMAN</a>   | 156   | 26938  | 15 (6)    | 10 (4)    |
| 4 <a href="#">CTRB1 HUMAN</a>  | 65    | 28479  | 3 (3)     | 3 (3)     |
| 5 <a href="#">MUC6 HUMAN</a>   | 64    | 258219 | 5 (1)     | 5 (1)     |
| 6 <a href="#">MSMB HUMAN</a>   | 55    | 13483  | 9 (2)     | 7 (2)     |
| 7 <a href="#">TIMP1 HUMAN</a>  | 49    | 23840  | 6 (3)     | 5 (3)     |
| 8 <a href="#">SAP HUMAN</a>    | 48    | 59899  | 6 (2)     | 4 (2)     |
| 9 <a href="#">CRIS3 HUMAN</a>  | 43    | 28524  | 7 (5)     | 6 (5)     |
| 10 <a href="#">CRIS2 HUMAN</a> | 36    | 28153  | 12 (3)    | 7 (3)     |
| 11 <a href="#">KLD7B HUMAN</a> | 36    | 54003  | 2 (1)     | 2 (1)     |
| 12 <a href="#">THG1 HUMAN</a>  | 34    | 35151  | 2 (1)     | 2 (1)     |
| 13 <a href="#">ACSA HUMAN</a>  | 31    | 79613  | 4 (1)     | 4 (1)     |
| 14 <a href="#">ECM1 HUMAN</a>  | 31    | 62232  | 2 (1)     | 2 (1)     |

## PSA Batch M02015

|                                | Score | Mass   | Matches | Sequences |
|--------------------------------|-------|--------|---------|-----------|
| 1 <a href="#">KLK3 HUMAN</a>   | 159   | 29293  | 66 (16) | 33 (10)   |
| 2 <a href="#">CTRA BOVIN</a>   | 56    | 26220  | 15 (2)  | 14 (2)    |
| 3 <a href="#">KTHY METHJ</a>   | 51    | 23197  | 1 (1)   | 1 (1)     |
| 4 <a href="#">M3K11 RAT</a>    | 42    | 93622  | 2 (1)   | 2 (1)     |
| 5 <a href="#">RSE1 EMENI</a>   | 41    | 135146 | 2 (1)   | 2 (1)     |
| 6 <a href="#">DIF DROME</a>    | 39    | 74630  | 2 (1)   | 1 (1)     |
| 7 <a href="#">ALDR BOVIN</a>   | 35    | 36296  | 2 (1)   | 2 (1)     |
| 8 <a href="#">KHSE SALAR</a>   | 33    | 33631  | 2 (1)   | 1 (1)     |
| 9 <a href="#">TIMP1 HUMAN</a>  | 32    | 23840  | 3 (1)   | 3 (1)     |
| 10 <a href="#">RF3 CYAP7</a>   | 32    | 61303  | 1 (1)   | 1 (1)     |
| 11 <a href="#">RGA ARATH</a>   | 29    | 64565  | 1 (1)   | 1 (1)     |
| 12 <a href="#">K2C1 HUMAN</a>  | 28    | 66170  | 1 (1)   | 1 (1)     |
| 13 <a href="#">Y3985 DICDI</a> | 27    | 5616   | 1 (1)   | 1 (1)     |
| 14 <a href="#">AMYG ASPAW</a>  | 25    | 68837  | 1 (1)   | 1 (1)     |

```

1 MWVPVVFLL SVTWIGAAPL ILSRIVGGWE CEKHSQPWQV LVASRGRAVC
51 GGVLVHPQWV LTAAH CIRNK SVI LLGRHSL FHPEDTGQVF QVSHSFPHPL
101 YDMSLLKNRF LRP GDDSSHD LMLLRLSEPA ELTDAVKVMD LPTQEPALGT
151 TCYASGWGSI EPEEFLTPKK LQCVDLHVIS NDVCAQVHPQ KVTKEMLCAG
201 RWTGGKSTCS GDSGGPLVCN GVLQGITSWG SEPCALPERP SLYTKVWHYR
251 KWIKDTIVAN P
    
```

Sequence Coverage: ~ 80 %

```

MWVPVVFLL SVTWIGAAPL ILSRIVGGWE CEKHSQPWQV LVASRGRAVC
GGVLVHPQWV LTAAH CIRNK SVI LGRHSL FHPEDTGQVF QVSHSFPHPL
YDMSLLKNRF LRP GDDSSHD LMLLRLSEPA ELTDAVKVMD LPTQEPALGT
TCYASGWGSI EPEEFLTPKK LQCVDLHVIS NDVCAQVHPQ KVTKEMLCAG
RWTGGKSTCS GDSGGPLVCN GVLQGITSWG SEPCALPERP SLYTKVWHYR
KWIKDTIVAN P
    
```

Sequence Coverage: ~ 70 %

*Both forms are relatively pure. Initial coverage indicates N-linked at aa.69.*

# Guidance: Approach of Experimental design

- **Considerations based upon the gPRG 2012**

- Enzyme
- Chromatography : C18 vs HILIC
- Ionization
- Mass spectrometry
- Fragmentation method : CID, ETD, HCD

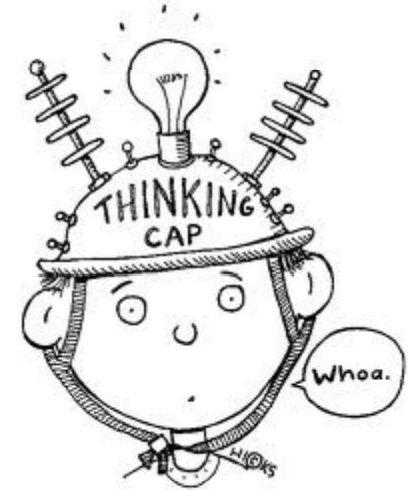

- **Our approach**

- Target the glycopeptides directly
- LC-MS/MS
- label free differential quantification

# Suggested Approach

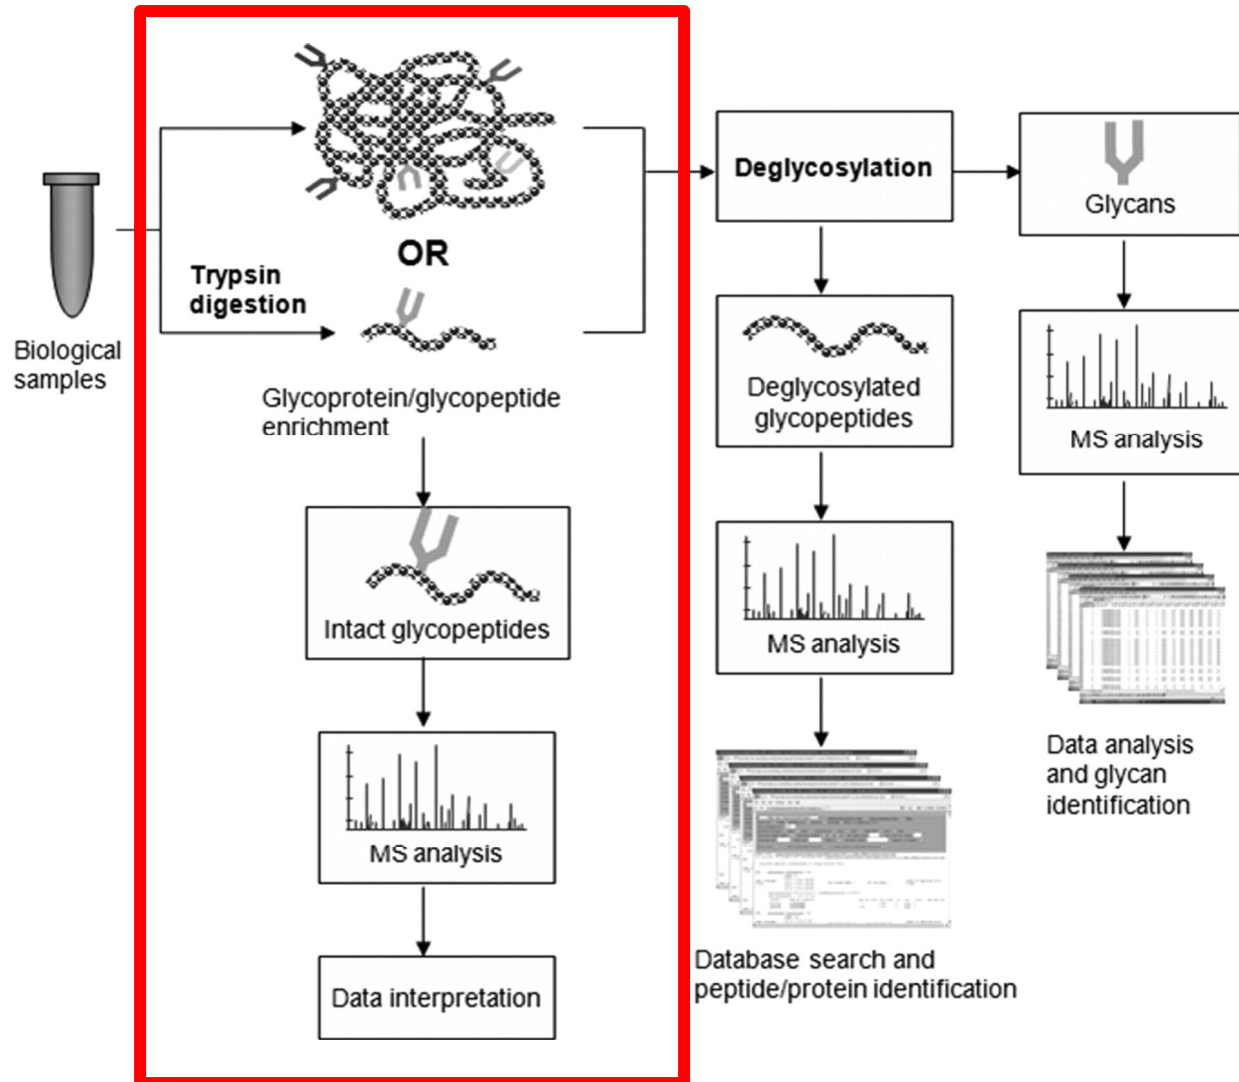

# Digestion to Peptides, Glycopeptides

|            |             |            |            |            |     |
|------------|-------------|------------|------------|------------|-----|
| MWVPVFLTL  | SVTWIGAAPL  | ILSRIVGGWE | CEKHSQPWQV | LVASRGRAVC | 50  |
| GGVLVHPQWV | LTAAHCI RNK | SVILLGRHSL | FHPEDTGQVF | QVSHSFPHPL | 100 |
| YDMSLLKNRF | LRPGDDSSHD  | LMLLRLSEPA | ELTDAVKVMD | LPTQEPALGT | 150 |
| TCYASGWGSI | EPEEFLTPKK  | LQCVDLHVIS | NDVCAQVHPQ | KVTKFMICAG | 200 |
| RWTGGKSTCS | GDSGGPLVCN  | GVLQGITSWG | SEPCALPERP | SLYTKVVHYR | 250 |
| KWIKDTIVAN | P           |            |            |            | 261 |

**Trypsin**

**ChymoT**

**ArgC**

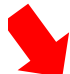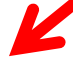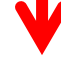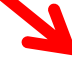

NK  
 NKS VILLGR  
 NKS VILLGRHSLFH...MSLLK  
 AVCGGVLVHPQWVLTAAHCI RNK  
 AVCGGVLVHPQWVLTAAHCI RNKSVILLGR

TAAHCIRNKS VIL  
 TAAHCIRNKS VILL  
 TAAHCIRNKS VI . .HSL  
 VLTAAHCI RNKSVIL  
 VLTAAHCI RNKSVILL

NKS VILLGR  
 NKS VILLGRHS . .LLKNR  
 NKS VILLG . .LMLLR  
 AVCGGVLVHPQ . .ILLGR

*PSA is very stable in solution with multiple di-sulfide bonds.*

*Location of R/K suggest trypsin approach for digestion could be a eventual problem .*

*ChymoT difficult to control*

# gPRG 2012 Study

- Study samples: Lee Biosolutions, PSA from seminal fluid
  - PSA: 100 ug
    - sufficient for protocol development
    - initial characterization
  - PSA high isoform: 20 ug
    - differential characterization & quantification
- **Time line**
  - **Sample distribution end of march March 2012**
  - **Reports due mid July 2012**
  - **Presentation at HUPO, September 2012, Boston**
  - **Presentation at ABRF, March 2013, Palm Springs**

# References

1. Ahmedin J. , Siegel R., Ward E., Hao Y., Xu J., Murray T., Thun M.J., Cancer Statistics 2008, *CA Cancer J Clin* , 2008, 58 (2), 71–96.
2. Pan S., Chen R., Aebersold R., Brentnall A.T., *Mass Spectrometry Based Glycoproteomics - From a Proteomics Perspective*, *Mol. Cell. Prot.*, 2011, Vol 10 (1) 1-14.
3. Varki A. , Cummings R.D., Esko J.D., Freeze H.H., Stanley P., Bertozzi C.R., Hart G.W., and Etzler M.E., *Essentials of Glycobiology*, 2nd edition, Cold Spring Harbor (NY), 2009.
4. Okada T, Sato, Y., Kobayashi N., Sumida K., Satomura S., Matsuura S., Takasaki M., Endo T., Structural characteristics of N-Glycans of two isoforms of prostate-specific antigens purified from human seminal fluid, *Biochim. Biophys. Acta*, 2001, 1525, 149-160
5. Tabares G., Radcliffe C.M., Barrabes S., Ramirez M., Aleixandre R.N., Hoesel W., Dwek R.A., Rudd P.M., Peracaula R., de Llorens R., Different glycan structures in prostate-specific antigen from prostate cancer sera in relation to seminal plasma PSA, *Glycobiology*, 2006, 16(2), 132-145
6. Barnidge DR, Goodmanson MK, Klee GG, Muddiman DC., Absolute quantification of the model biomarker PSA in serum by LC/MS using protein cleavage and isotope dilution mass spectrometry, *J Proteome Res.*, 2004, 3(3), 644-652.
7. Ohyama C, Hosono M, Nitta K, Oh-eda M, Yoshikawa K, Habuchi T, Arai Y, Fukuda M., Carbohydrate structure and differential binding of prostate specific antigen to Maackia amurensis lectin between prostate cancer and benign prostate hypertrophy, *Glycobiology*, 2004 , 14(8), 671-679
8. Peracaula R., Tabares G., Royle L., Harvey D.J., Dwek R.A., Rudd P.M., de Llorens R., Altered glycosylation pattern allows the distinction between prostate-specific antigen (PSA) from normal and tumor origins,
9. Tajiri M., Ohyama C., Wada Y., Oligosaccharide profiles of the PSA in free and complexed forms from the prostate cancer patient serum and seminal plasma : a glycopeptide approach, *Glycobiology*, 2008, 18(1), 2-8
10. Saldo R, Fan Y, Fitzpatrick JM, Watson RW, Rudd PM., Core fucosylation and alpha 2-3 sialylation in serum N-glycome is significantly increased in prostate cancer comparing to benign prostate hyperplasia, *Glycobiology*, 2011,21(2):195-205.
11. Sarrats A, Saldo R, Comet J, O'Donoghue N, de Llorens R, Rudd PM, Peracaula R., Glycan Characterization of PSA 2.DE subforms from serum and seminal plasma, *OMICS*, 2010, 14(4):465-74.
12. Yan Li, Yuan Tian, Taha Rezai, Amol Prakash, Mary F. Lopez, Daniel W. Chan, and Hui Zhang, Simultaneous Analysis of Glycosylated and Sialylated Prostate-Specific Antigen Revealing Differential Distribution of Glycosylated Prostate-Specific Antigen Isoforms in Prostate Cancer Tissues, *Anal. Chem.*, 2011, 83 (1), pp 240–245.
13. Sarrats A., Comet J., Tabarés G., Ramírez M., Aleixandre R.N., de Llorens R., Peracaula R., Differential percentage of Serum PSA subforms suggests a new way to improve prostate cancer diagnosis, *Prostate*, 2010, 70, 1-9.

**Supplemental Figure 2.** Conditions used for (a) enzymatic peptide digestion (b) glycoprotein treatment and (c) PNGase F *N*-glycan release.

(a)

| Lab     | Enzyme                            | Qty (µg) | Buffer                             | pH    | Red/Alk       | Enz/Prot.              | Digest Cond.           | Note             |
|---------|-----------------------------------|----------|------------------------------------|-------|---------------|------------------------|------------------------|------------------|
| 1       | Tryp                              | [2;4]    | 100mM Am Bic                       | 8     | DTT, IAA      | 1:50                   | 24h                    | Solution         |
| 2 (a)   | Tryp Sequencing Grade, Roche      | 2.5      | 50mM Am Bic                        | 8     | DTT, IAA      | 1:50                   | 37C, 15h               | SDS-PAGE         |
| 3       | Tryp                              | 100-20   | 6M UREA, exchanged 30 kDa MWC      | 8     | DDT, TCEP     | 1:50                   | 37C                    | Solution         |
| 4       | Tryp reductively methylated, TPCK | [10;3]   | 1.6M Gdn-> 0.1M Gdn, 50mM Am Bic   | 8.3   | DDT, IAA      | 1:10                   | 37C, 18h               | Solution         |
| 5       | Tryp sequencing modified, Promega | 3        | 10 mM Tris, 0.6 M Urea             | 7.8   | -             | 1:20                   | OV                     | Solution         |
| 6       | Tryp Gold, Promega                | [.6; .4] | 50mM PBS, 150mM NaCl               | 7-7.5 | -             | 1:25                   | 37.5C, 16h             | Solution         |
| 7       | Tryp                              | <1       | 0.5M Triethyl Am Bic               | 8.5   | TCEP, MTS     | 1:20                   | 37C, 3h                | Solution         |
| 8       | Tryp Sequencing grade, Promega    | 3        | 50mM Am Bic, 10%ACN                | -     | -             | 1:50                   | 37C, 13h               | SDS-PAGE         |
| 9 (a)   | Tryp, Promega                     | [1;3]    | 8M UREA -> 1M UREA, 50 mM Am Bic   | 8     | DDT, IAA      | 1:40                   | 37C, 12h               | Solution         |
| 10      | Tryp                              | 10       | 1.6M Gdn-> 0.3M Gnd, 50mM Am Bic   | -     | -             | -                      | -                      | SDS-PAGE         |
| 11 (31) | ChymoTryp                         | [10;50]  | 50 mM Am Bic                       | 8     | -             | 1:50                   | 18h                    | Immobilized bead |
| 12      | ChymoTryp                         | 2        | 100mM Tris, 10mM CaCl <sub>2</sub> | 8     | -             | 1:20                   | 50C, 1.5h Barocycler   | Solution         |
| 13      | Tryp and ChymoTryp                | 1        | 50mM Am Bic                        | 8     | -             | 1:100                  | 57C, 30min             | Solution         |
| 14      | ArgC                              | 8        | 90mM Tris, 8.5mM CaCl <sub>2</sub> | 7.6   | DDT, EDTA     | 1:50                   | 37C, 24h               | Solution         |
| 15      | ArgC-Tryp                         | [4;10]   | 50 mM Am Bic                       |       | TCEP, IAA     | Arg 1:50<br>Tryp 1:100 | ArgC , 24h<br>Tryp :2h | Solution         |
| 16      | LysC                              | 10       | 0.1M Am Bic                        | 8     | S-CarboMethyl | 1:50                   | 24h                    | Solution         |
| 17      | Lysyl Endopeptidase, Wako         | 7        | 100mM Tris-HCl                     | 8.5   | BABAC         | 1:20                   | 37C, 16h               | Solution         |
| 18 (a)  | LysC                              | [14-70]  | 80mM TEAB, 10% ACN                 | 8.6   | -             | 1:75-1:60              | 37C, 4h                | Solution         |
| 19 (b)  | Arg C                             |          | 50 mM Am Bic                       | 8.3   | yes           | 1:50                   | 37C, 14h               | Solution         |

(b)

| Lab    | Qty (µg) | Red/Alk |
|--------|----------|---------|
| 18 (b) | [14-70]  | Yes     |
| 19 (b) | 15       | Yes     |
| 20     | 1        | -       |
| 21     | 30       | -       |

(c)

| Labs   | Qty (µg) | Enzyme    | Digest Cond. | Note                                           | Treatment of Released Glycans                 | Purification           |
|--------|----------|-----------|--------------|------------------------------------------------|-----------------------------------------------|------------------------|
| 9 (21) | 1        | 2Unit     | 37C, 24h     | Immobilized on PVDFMembrane                    | Red. 3h 50°C, 1 M NaBH <sub>4</sub> 50 mM KOH | SCX SPE PGC SPE        |
| 2 (21) | 2.5      | -         | 37C, 24h     | Immobilized on PVDFMembrane                    | Red. 3h 50°C, 1 M NaBH <sub>4</sub> 50 mM KOH | SCX SPE PGC SPE        |
| 22     | 10       | 5ug       | 37C, 18h     | Solution, pH 7.5, 50mM PBS                     | -                                             | -                      |
| 23     | [60-12]  | 4000 U/ml | 37, 16h      | pH 8, 50mM Am Bi and ME, 0.1% SDS, 0.75% NP-40 | Permethylated                                 | Methanol precipitation |
| 24     | 12       | 0.7 Unit  | 37, 20h      | pH 7.5, 5mM PBS, SDS, 0.5mM DDT, NP-40         | -                                             | -                      |



**Supplemental Figure 3.** Bioinformatics tools used by participating laboratories to interpret tandem data acquired on (a) glycopeptides (bottom-up method), (b) glycoprotein (top-down approach), (c) *N*-glycans (PNGase F release method).

(a). Glycopeptides (Bottom-up approach)

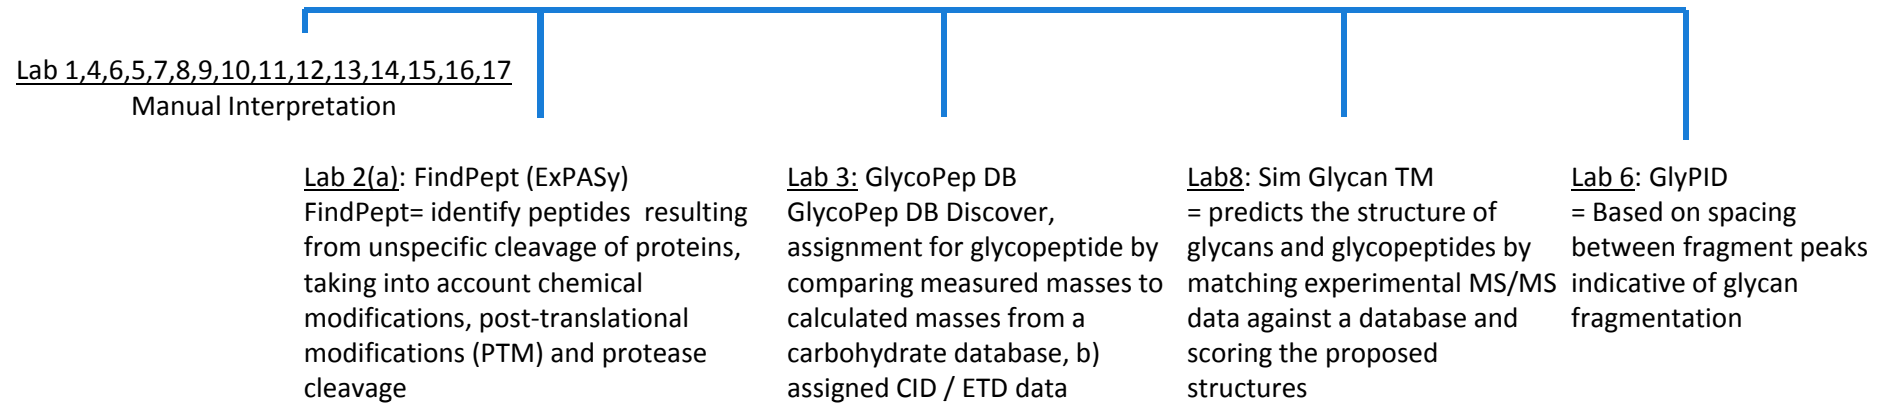

(b). Glycoprotein (Top-down approach)

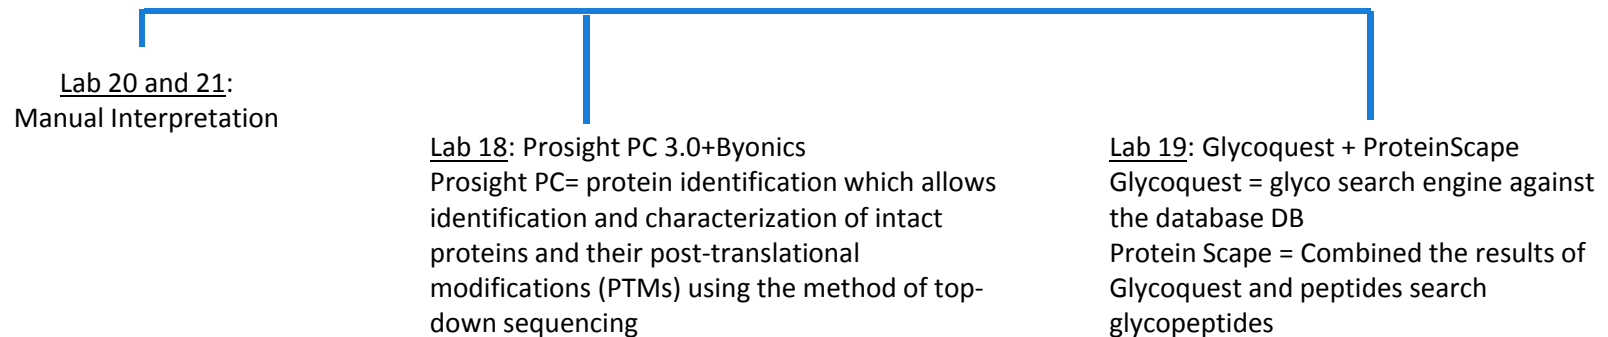

(c) . Released *N*-Glycans (PNGase F approach)

Lab 9(b), 22,23 manually interpreted the tandem MS/MS data, Glycomod was used by lab 2 (b)

**Supplemental Figure 4.** Sample Integrity: *N*-glycan profile of (a) PSA and (b) PSA high isoform presented by laboratories 23 and 9.

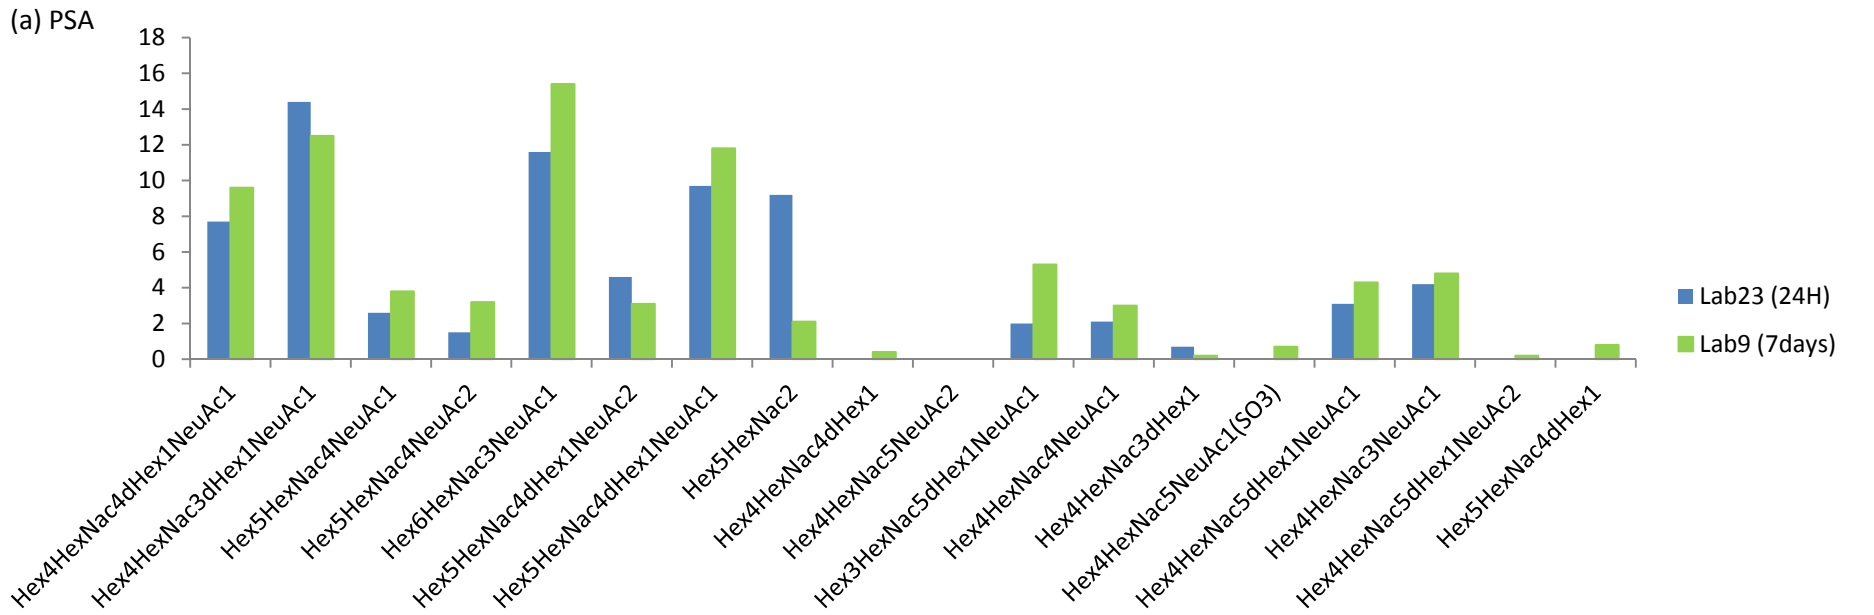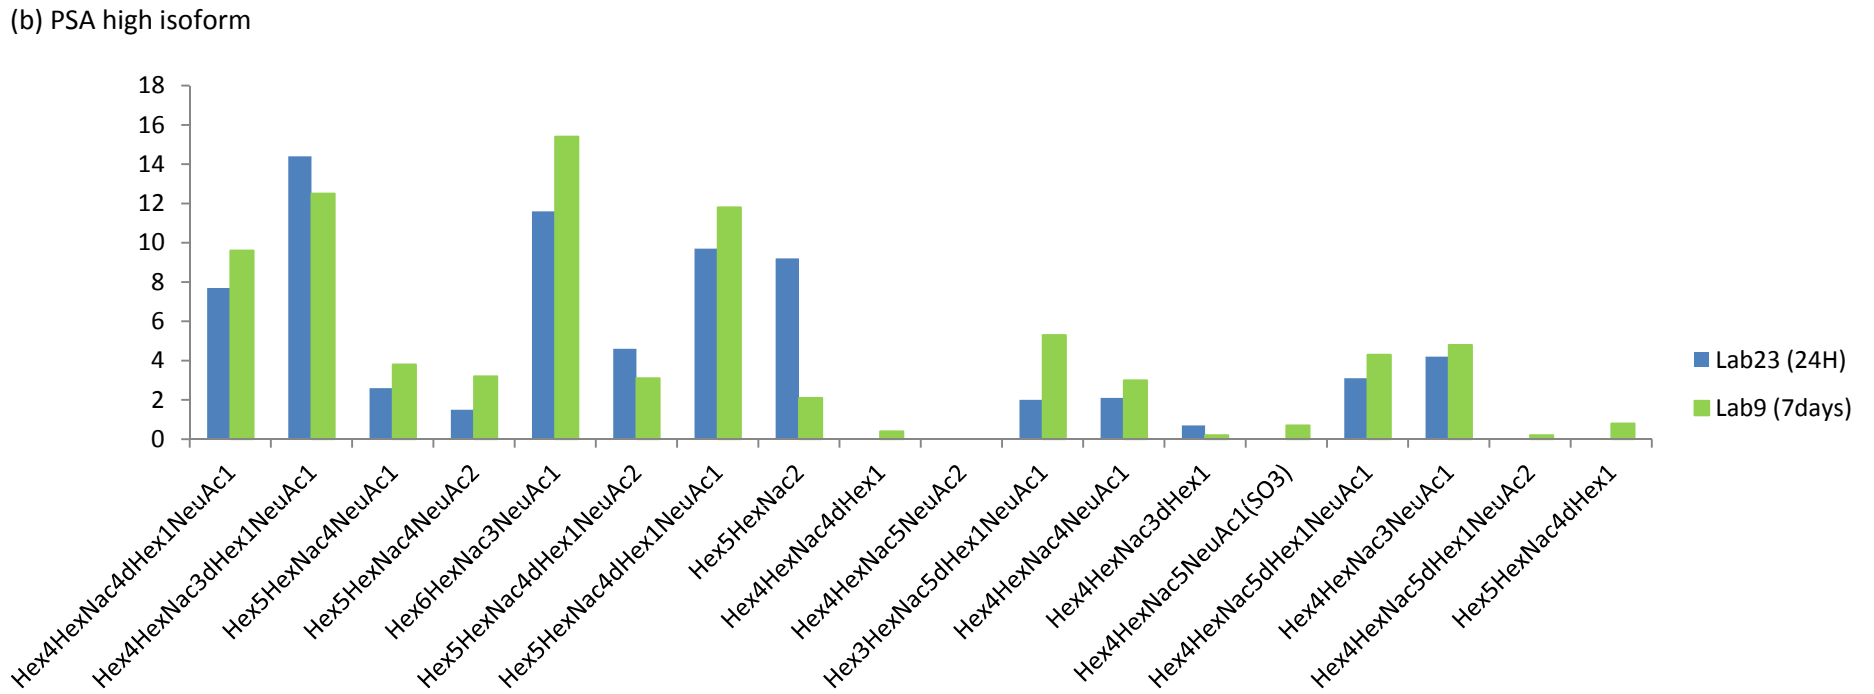

**Supplemental Figure 5.** Average relative intensity of each glycan composition for the consensus cluster C (a) major & (b) intermediate glycans.

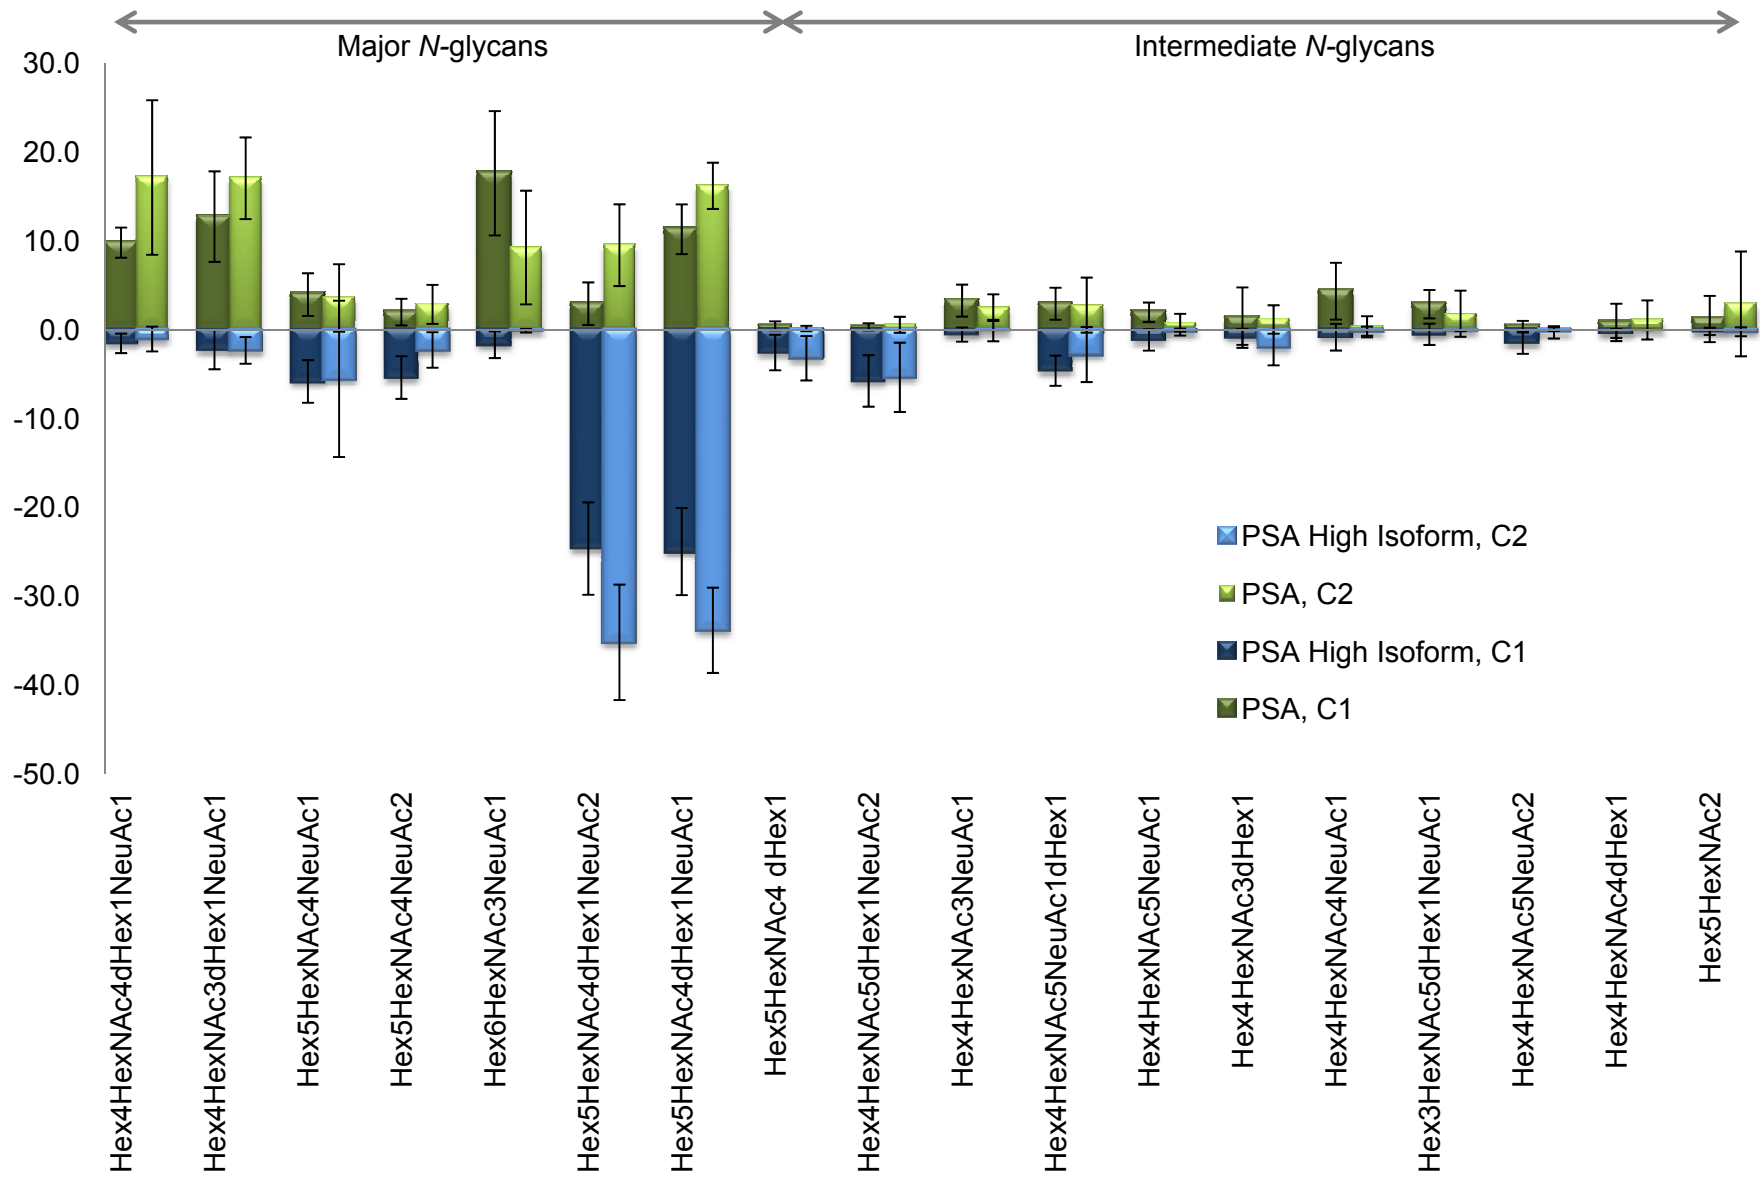

Supplement: supp_M113.030643_mcp.M113.030643-1.pdf [file supp_M113.030643_mcp.M113.030643-1.pdf]
